# Supplementary material
Source: PubMed Central journal article supplement (PMC522023)

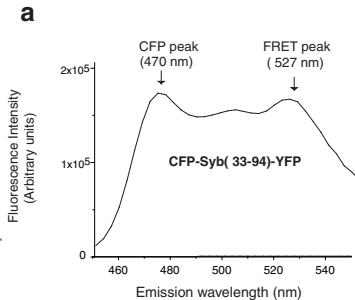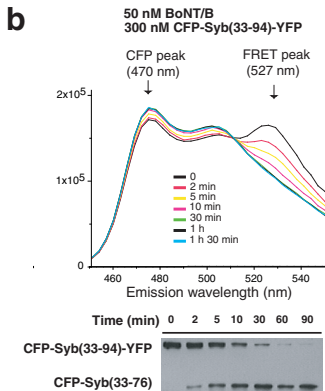

Supplement: pnas_101_41_14701__1.pdf [file pnas_101_41_14701__1.pdf]

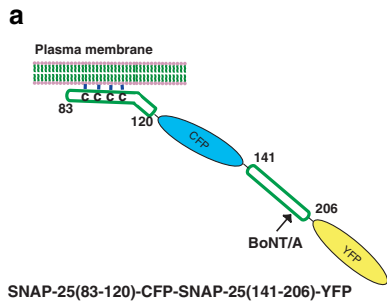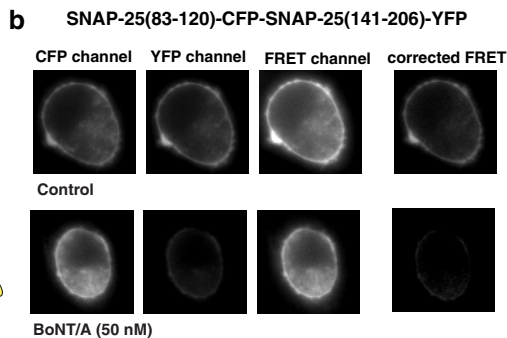

SNAP-25(83-120)-CFP-SNAP-25(141-206)-YFP

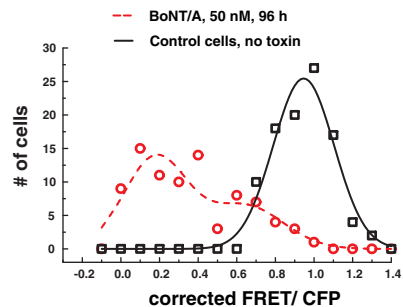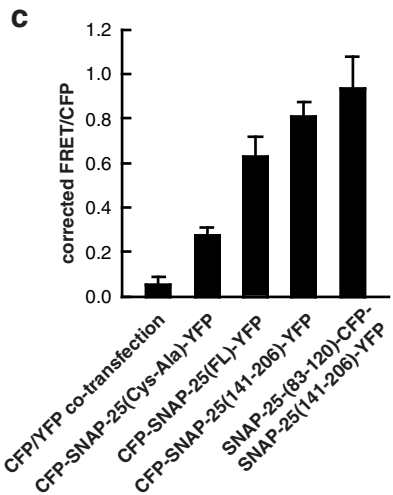

Supplement: pnas_101_41_14701__2.pdf [file pnas_101_41_14701__2.pdf]
